# Supplementary material for: Etiological characteristics of acute respiratory infections during the SARS-CoV-2 epidemic in Guizhou Province, China
Source: PubMed Central journal article supplement — J Int Med Res. 2024 Mar 23;52(3):03000605241236050. doi: 10.1177/03000605241236050 (PMC10960980; doi:10.1177/03000605241236050), 2024-03-23
Supplement: sj-pdf-1-imr-10.1177_03000605241236050.pdf [file sj-pdf-1-imr-10.1177_03000605241236050.pdf]

# Reporting checklist for case report or case series.

Based on the CARE guidelines.

## Instructions to authors

Complete this checklist by entering the page numbers from your manuscript where readers will find each of the items listed below.

Your article may not currently address all the items on the checklist. Please modify your text to include the missing information. If you are certain that an item does not apply, please write "n/a" and provide a short explanation.

Upload your completed checklist as an extra file when you submit to a journal.

In your methods section, say that you used the CARE reporting guidelines, and cite them as:

Gagnier JJ, Kienle G, Altman DG, Moher D, Sox H, Riley D; the CARE Group. The CARE Guidelines: Consensus-based Clinical Case Reporting Guideline Development

|                 | Reporting Item                                                                    | Page Number |
|-----------------|-----------------------------------------------------------------------------------|-------------|
| <b>Title</b>    |                                                                                   |             |
|                 | <a href="#">#1</a> The area of focus and “case report” should appear in the title | 1           |
| <b>Keywords</b> |                                                                                   |             |
|                 | <a href="#">#2</a> Two to five key words that identify topics in this case report | 1           |
| <b>Abstract</b> |                                                                                   |             |
| Introduction    | <a href="#">#3a</a> What is unique and why is it important?                       | 1           |
|                 | <a href="#">#3b</a> The patient’s main concerns and important clinical findings.  | 1           |
|                 | <a href="#">#3c</a> The main diagnoses, interventions, and outcomes.              | 1           |
| Conclusion      | <a href="#">#3d</a> What are one or more “take-away” lessons?                     | 1           |

## Introduction

[#4](#) Briefly summarize why this case is unique with medical literature references. 1-2

## Patient information

[#5a](#) De-identified demographic and other patient information. 2

[#5b](#) Main concerns and symptoms of the patient. n/a. The study was a retrospective study of observations and did not address this message

[#5c](#) Medical, family, and psychosocial history including genetic information. n/a. The study was a retrospective study of observations and did not address this message

[#5d](#) Relevant past interventions and their outcomes. n/a. The study was a retrospective study of observations and did not address this message

## Clinical findings

[#6](#) Relevant physical examination (PE) and other clinical findings. n/a. The study was a retrospective study of observations and did not address this message

## Timeline

[#7](#) Relevant data from this episode of care organized as a timeline (figure or table). n/a. The study was a retrospective study of observations and did not address this message

## Diagnostic assessment

[#8a](#) Diagnostic methods (PE, laboratory testing, imaging, surveys). 2-3

|                     |                                                       |                                                                                           |
|---------------------|-------------------------------------------------------|-------------------------------------------------------------------------------------------|
| <a href="#">#8b</a> | Diagnostic challenges.                                | n/a. The study was a retrospective study of observations and did not address this message |
| <a href="#">#8c</a> | Diagnostic reasoning including differential diagnosis | n/a. The study was a retrospective study of observations and did not address this message |
| <a href="#">#8d</a> | Prognostic characteristics when applicable            | n/a. The study was a retrospective study of observations and did not address this message |

## Therapeutic Intervention

|                     |                                                              |                                                                                           |
|---------------------|--------------------------------------------------------------|-------------------------------------------------------------------------------------------|
| <a href="#">#9a</a> | Types of intervention (pharmacologic, surgical, preventive). | n/a. The study was a retrospective study of observations and did not address this message |
| <a href="#">#9b</a> | Administration of intervention (dosage, strength, duration)  | n/a. The study was a retrospective study of observations and did not address this message |
| <a href="#">#9c</a> | Changes in the interventions with explanations.              | n/a. The study was a retrospective study of observations and did not address this message |

## Follow up and outcomes

|                      |                                                                  |                                                                                           |
|----------------------|------------------------------------------------------------------|-------------------------------------------------------------------------------------------|
| <a href="#">#10a</a> | Clinician and patient-assessed outcomes when appropriate         | n/a. The study was a retrospective study of observations and did not address this message |
| <a href="#">#10b</a> | Important follow-up diagnostic and other test results.           | n/a. The study was a retrospective study of observations and did not address this message |
| <a href="#">#10c</a> | Intervention adherence and tolerability (how was this assessed)? | n/a. The study was a retrospective study of observations and did not address this message |

|                      |                                   |                                                                                           |
|----------------------|-----------------------------------|-------------------------------------------------------------------------------------------|
| <a href="#">#10d</a> | Adverse and unanticipated events. | n/a. The study was a retrospective study of observations and did not address this message |
|----------------------|-----------------------------------|-------------------------------------------------------------------------------------------|

## Discussion

|                      |                                                          |      |
|----------------------|----------------------------------------------------------|------|
| <a href="#">#11a</a> | Strengths and limitations in your approach to this case. | 8-10 |
|----------------------|----------------------------------------------------------|------|

|                      |                                                |      |
|----------------------|------------------------------------------------|------|
| <a href="#">#11b</a> | Discussion of the relevant medical literature. | 8-10 |
|----------------------|------------------------------------------------|------|

|                      |                                     |      |
|----------------------|-------------------------------------|------|
| <a href="#">#11c</a> | The rationale for your conclusions. | 8-10 |
|----------------------|-------------------------------------|------|

|                      |                                                        |                                                                                           |
|----------------------|--------------------------------------------------------|-------------------------------------------------------------------------------------------|
| <a href="#">#11d</a> | The primary “take-away” lessons from this case report. | n/a. The study was a retrospective study of observations and did not address this message |
|----------------------|--------------------------------------------------------|-------------------------------------------------------------------------------------------|

## Patient perspective

|                     |                                                       |                                                                                           |
|---------------------|-------------------------------------------------------|-------------------------------------------------------------------------------------------|
| <a href="#">#12</a> | The patient can share their perspective on their case | n/a. The study was a retrospective study of observations and did not address this message |
|---------------------|-------------------------------------------------------|-------------------------------------------------------------------------------------------|

## Informed consent

|                     |                                           |                                                                                           |
|---------------------|-------------------------------------------|-------------------------------------------------------------------------------------------|
| <a href="#">#13</a> | The patient should give informed consent. | n/a. The study was a retrospective study of observations and did not address this message |
|---------------------|-------------------------------------------|-------------------------------------------------------------------------------------------|

None The CARE checklist is distributed under the terms of the Creative Commons Attribution License CC-BY-NC. This checklist can be completed online using <https://www.goodreports.org/>, a tool made by the [EQUATOR Network](#) in collaboration with [Penelope.ai](#)
